# Supplementary material for: Characterization of Pan social systems reveals in-group/out-group distinction and out-group tolerance in bonobos
Source: PubMed Central journal article supplement — Proc Natl Acad Sci U S A. 2022 Jun 21;119(26):e2201122119. doi: 10.1073/pnas.2201122119 (PMC9245655; doi:10.1073/pnas.2201122119), 2022-06-21
Supplement: pnas.2201122119.sapp.pdf [file pnas.2201122119.sapp.pdf]

Supplementary Information -

**Characterization of *Pan* social systems reveals in-group out-group distinction and out-group tolerance in bonobos**

Liran Samuni, Kevin E. Langergraber, Martin H. Surbeck

**Table S1.** Summary of bonobo within cluster characteristics

|      | Cluster     | Cluster size | Observation days | Party size  | Relative party size | % significant associates <sup>1</sup> |
|------|-------------|--------------|------------------|-------------|---------------------|---------------------------------------|
| 2017 | Ekalakala   | 9            | 346              | 6.26 ± 2.00 | 0.62 ± 0.20         | 52% (19)                              |
|      | Kokoalongo  | 27           | 324              | 9.20 ± 4.58 | 0.34 ± 0.17         | 50% (162)                             |
|      | KokoalongoN | 15           | -                | 7.35 ± 3.43 | 0.50 ± 0.22         | 78% (82)                              |
|      | KokoalongoS | 12           | -                | 4.17 ± 2.52 | 0.35 ± 0.21         | 71% (39)                              |
| 2018 | Ekalakala   | 11           | 321              | 5.58 ± 2.04 | 0.53 ± 0.19         | 52% (29)                              |
|      | Kokoalongo  | 25           | 313              | 7.47 ± 3.41 | 0.33 ± 0.15         | 47% (143)                             |
|      | KokoalongoN | 15           | -                | 5.48 ± 2.81 | 0.41 ± 0.21         | 74% (78)                              |
|      | KokoalongoS | 10           | -                | 3.88 ± 2.06 | 0.41 ± 0.22         | 55% (25)                              |
| 2019 | Ekalakala   | 11           | 343              | 6.65 ± 2.32 | 0.60 ± 0.21         | 50% (28)                              |
|      | Fekako      | 7            | 257              | 4.97 ± 1.36 | 0.71 ± 0.19         | 47% (10)                              |
|      | Kokoalongo  | 20           | 343              | 7.15 ± 3.44 | 0.38 ± 0.18         | 46% (89)                              |
|      | KokoalongoN | 12           | 219*             | 5.19 ± 2.51 | 0.47 ± 0.23         | 78% (52)                              |
|      | KokoalongoS | 8            | 170*             | 4.31 ± 2.03 | 0.54 ± 0.25         | 100% (28)                             |

\* followed separately since March 2019

<sup>1</sup> Percentage (and number) of dyads that are significant associates. Significant associates were defined as  $SRI_{obs} > SRI_{exp}$  in at least 95% of cases (randomisations were conducted at the level of the cluster).

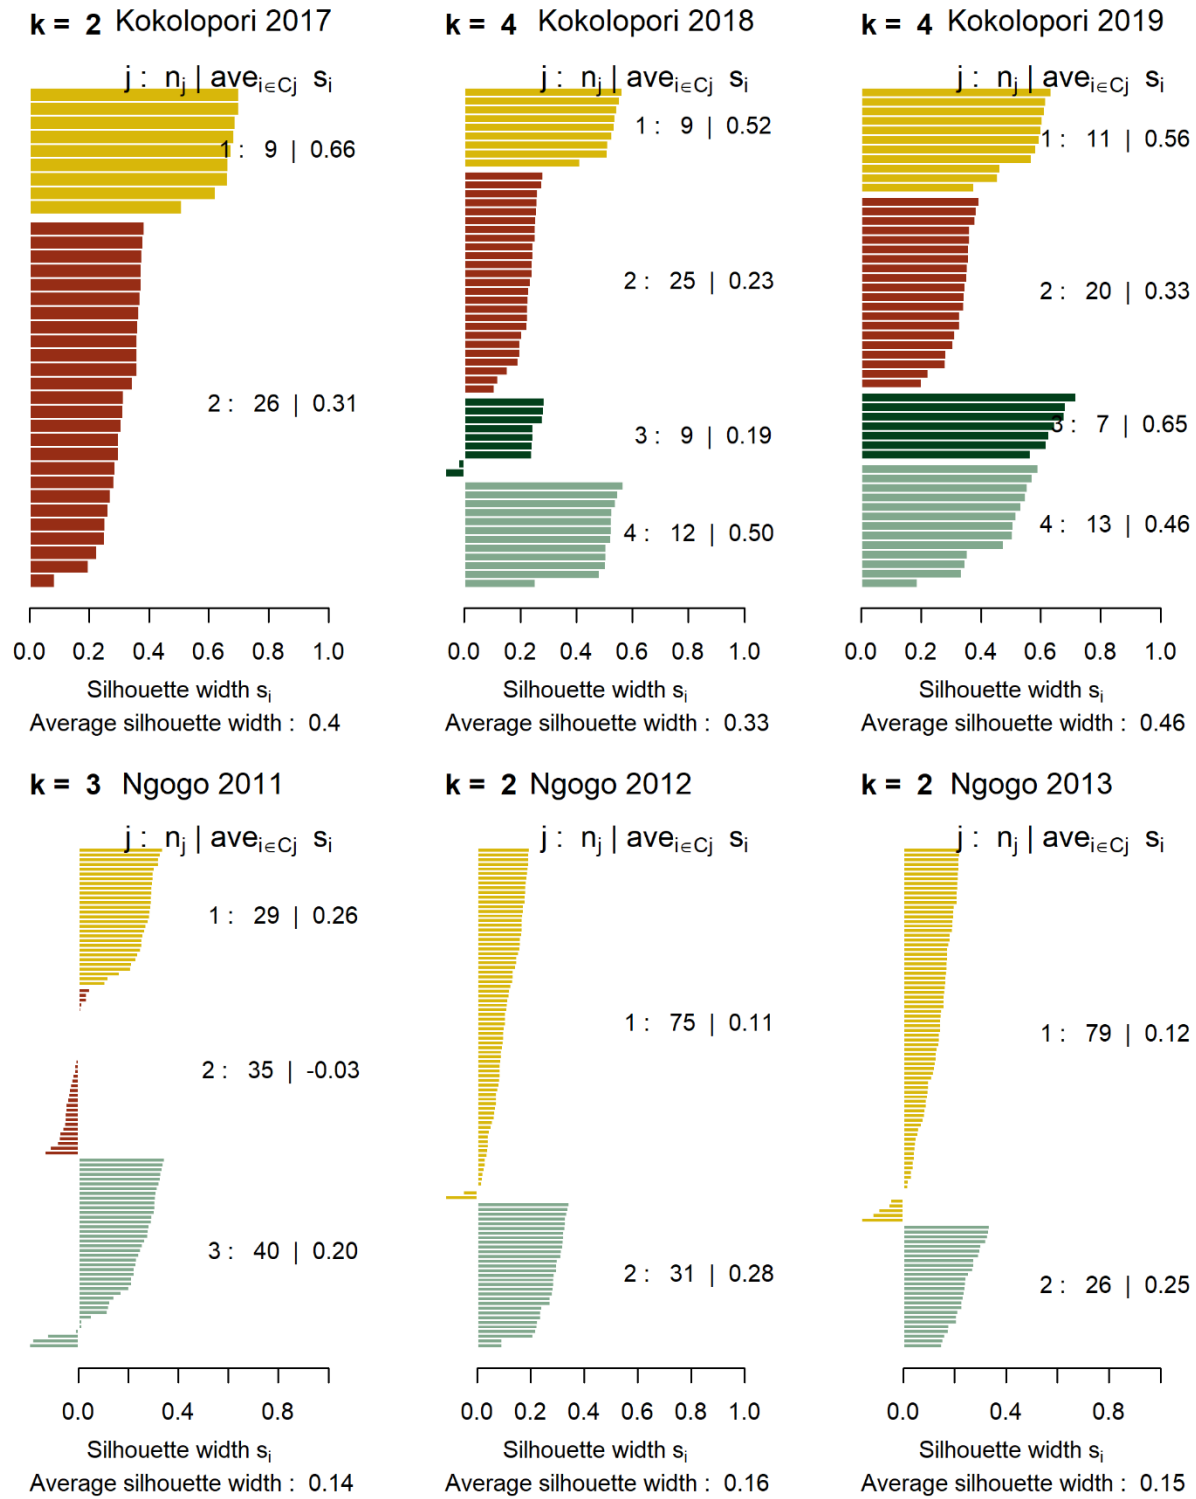

**Figure S1.** Yearly silhouette coefficient in Kokolopori (2017-2019) and Ngogo (2011-2013). The different colours represent different clusters according to the optimal number of clusters detected by the silhouette coefficient. In 2017, only data from the Ekalakala and Kokoalongo groups was included.

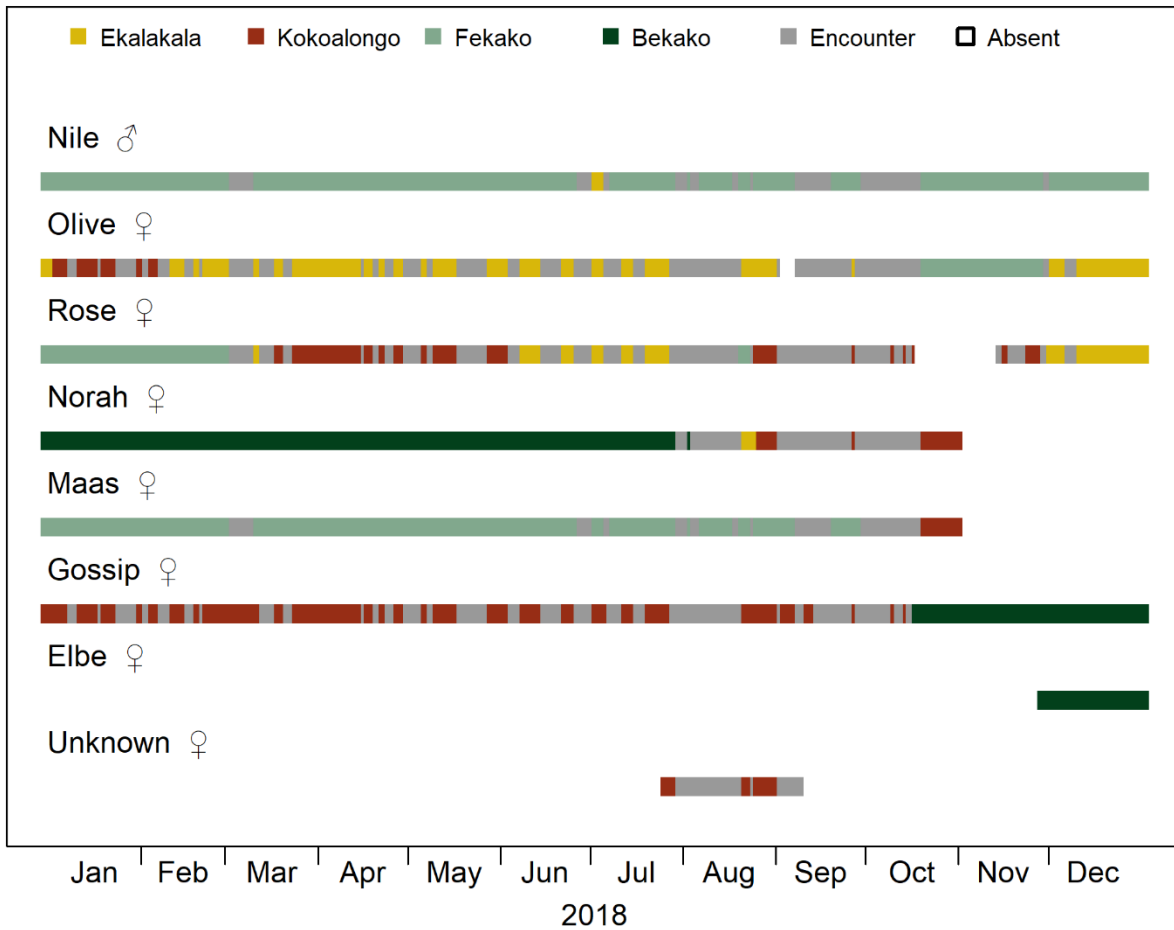

**Figure S2.** Female and male transfer patterns in Kokolopori. Shown in colours are the group association patterns of seven nulliparous females and one adult male during 2018. Most transfers occurred during intergroup encounters (grey).

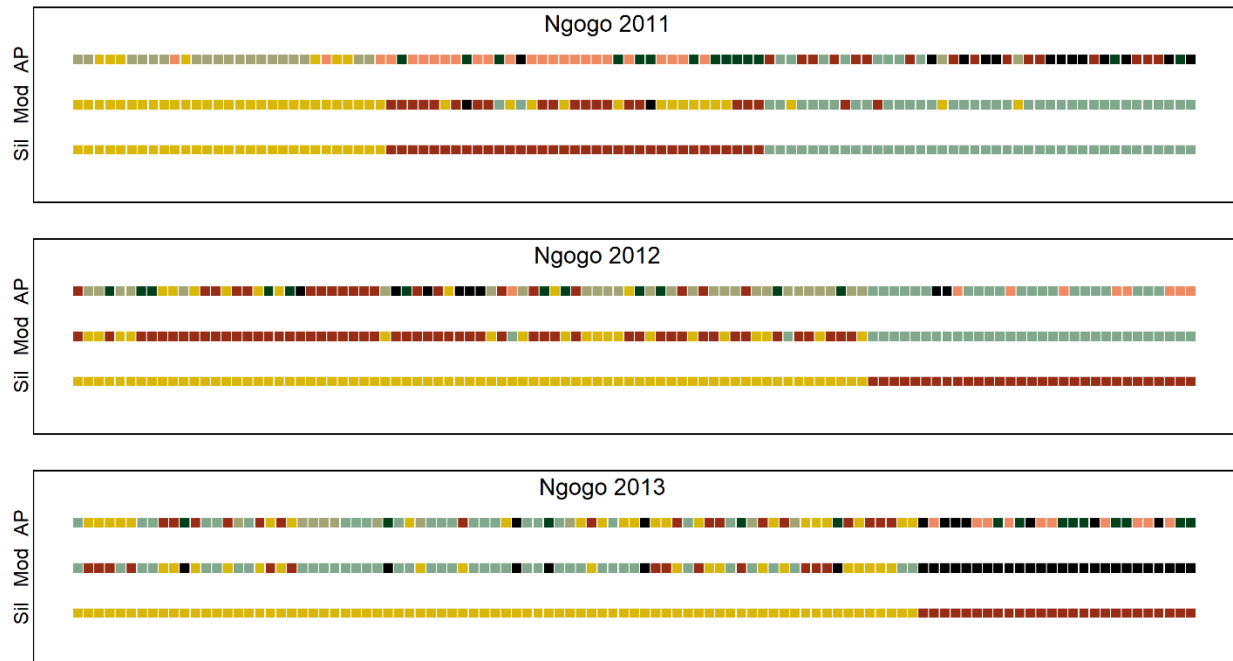

**Figure S3.** Comparison of the optimal number of clusters detected by the Silhouette index (Sil), modularity (Mod), and affinity propagation (AP) in Ngogo chimpanzees per year (2011-2013). Each square represents an individual and the colours represent the cluster assignment of individuals (i.e., individuals that were assigned together appear under the same colour) within each method (y axis). Squares (individuals) appear at the same order across the three methods so that between-method inconsistencies can be easily detected.

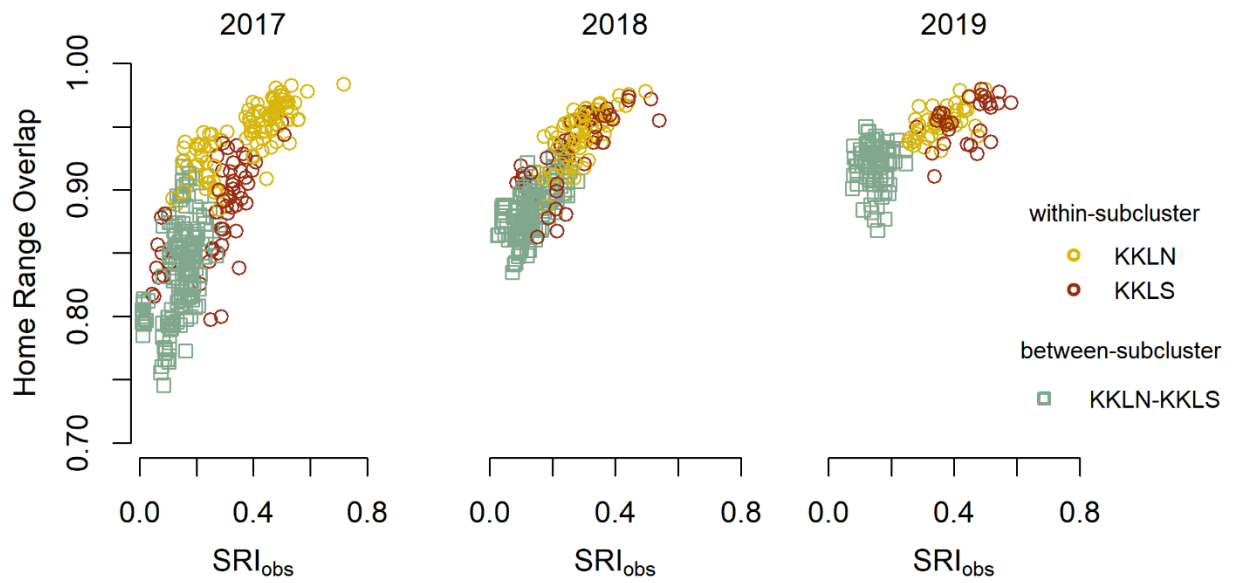

**Figure S4.** The yearly home range overlap (y-axis) as a function of the SRI<sub>obs</sub> (x-axis) for bonobo dyads within the Kokoalongo subclusters (KKLN and KKLS). Circles or squares represent values for within- or between-subcluster dyads, respectively.
